# 1 **A robust and tunable mitotic oscillator in artificial cells**

2  
3 **Ye Guan<sup>1,2</sup>, Zhengda Li<sup>1,3</sup>, Shiyuan Wang<sup>1</sup>, Patrick M. Barnes<sup>4</sup>, Xuwen Liu<sup>5</sup>, Haotian**  
4 **Xu<sup>6</sup>, Minjun Jin<sup>7</sup>, Allen P. Liu<sup>1,8</sup>, and Qiong Yang<sup>1,3,4\*</sup>**

5  
6 <sup>1</sup>Department of Biophysics, University of Michigan, Ann Arbor, Michigan 48109, USA.

7 <sup>2</sup>Department of Chemistry, University of Michigan, Ann Arbor, Michigan 48109, USA.

8 <sup>3</sup>Department of Computational Medicine & Bioinformatics, University of Michigan, Ann Arbor,  
9 Michigan 48109, USA.

10 <sup>4</sup>Department of Physics, University of Michigan, Ann Arbor, Michigan 48109, USA.

11 <sup>5</sup>Department of Physics, University of Science and Technology of China, China.

12 <sup>6</sup>Department of Computer Science, Wayne State University, Detroit, Michigan 48202, USA.

13 <sup>7</sup>Department of Biological Chemistry, University of Michigan, Ann Arbor, Michigan 48109, USA.

14 <sup>8</sup>Department of Mechanical Engineering, University of Michigan, Ann Arbor, Michigan 48109, USA.

15 \*Correspondence: [qiongy@umich.edu](mailto:qiongy@umich.edu)

## 16 17 **ABSTRACT**

18 Single-cell analysis is pivotal to deciphering complex phenomena like cellular  
19 heterogeneity, bistable switch, and oscillations, where a population ensemble cannot  
20 represent the individual behaviors. Bulk cell-free systems, despite having unique  
21 advantages of manipulation and characterization of biochemical networks, lack the  
22 essential single-cell information to understand a class of out-of-steady-state dynamics  
23 including cell cycles. Here we develop a novel artificial single-cell system by encapsulating  
24 *Xenopus* egg extracts in water-in-oil microemulsions to study mitotic dynamics. These  
25 “cells”, adjustable in sizes and periods, sustain oscillations for over 30 cycles, and function  
26 in forms from the simplest cytoplasmic-only to the more complicated ones involving nuclei  
27 dynamics, mimicking real mitotic cells. Such innate flexibility and robustness make it key  
28 to studying clock properties of tunability and stochasticity. Our result also highlights energy  
29 supply as an important regulator of cell cycles. We demonstrate a simple, powerful, and  
30 likely generalizable strategy of integrating strengths of single-cell approaches into  
31 conventional *in vitro* systems to study complex clock functions.

32

### 33 INTRODUCTION

34 Spontaneous progression of cell cycles represents one of the most extensively studied  
35 biological oscillations. Cytoplasmic extracts predominantly from *Xenopus* eggs (Murray,  
36 1991) have made major contributions to the initial discovery and characterization of the  
37 central cell-cycle regulators including the protein complex cyclin B1-Cdk1 (Murray et al.,  
38 1989;Lohka and Maller, 1985;Lohka et al., 1988) and the anaphase-promoting complex  
39 or cyclosome (APC/C) (Sudakin et al., 1995), as well as downstream mitotic events of  
40 spindle assembly and chromosome segregation (Hannak and Heald, 2006). Moreover,  
41 detailed dissections of the regulatory circuits in these extracts revealed architecture of  
42 interlinked positive and negative feedbacks (Kumagai and Dunphy, 1992;Mueller et al.,  
43 1995;Yang and Ferrell, 2013;Chang and Ferrell, 2013;Trunnell et al., 2011;Kim and  
44 Ferrell, 2007;Pomerening et al., 2005;Pomerening et al., 2003;Novak and Tyson,  
45 1993b;Thron, 1996) (Figure 1A). Such interlinked feedback loops are also found in many  
46 other biological oscillators (Rust et al., 2007;Hoffmann et al., 2002;Cross, 2003;Lee et al.,  
47 2000), suggesting its importance to essential clock functions such as robustness and  
48 tunability (Tsai et al., 2008). These studies stimulated major interests in characterization  
49 of clock functions at the single cell level, for which an experimental platform is still lacking.

50 Compared to *in vivo* systems, circuits reconstituted in cell-free extracts contain well-  
51 defined recombinant molecules and are more amenable to systematic design,  
52 manipulation and quantitative biochemical measurements. However, one major limitation  
53 for most *in vitro* reconstitutions up to date is that oscillations are generated in well-mixed  
54 bulk solutions, which tend to produce quickly damped oscillations (Pomerening et al.,  
55 2005). Additionally, these bulk reactions lack the similarity to the actual cell dimensions  
56 and the ability of mimicking spatial organization achieved by functional  
57 compartmentalization in real cells. These limitations make it impossible to retrieve the  
58 cellular heterogeneity to investigate important and challenging questions, such as  
59 stochasticity and tunability of an oscillator.

60 To overcome these challenges, we developed an artificial mitotic cycle system by  
61 encapsulating reaction mixtures containing cycling *Xenopus* egg cytoplasm (Murray,  
62 1991) in cell-scale micro-emulsions. These droplet-based cells are stable for days and  
63 keep oscillating for dozens of cycles, offering large gains in high-throughput and long-term  
64 tracking of dynamical activities in individual droplets. In this system, we successfully  
65 reconstituted a series of mitotic events including chromosome condensation, nuclear  
66 envelope breakdown and destruction of anaphase substrates such as the proteins securin  
67 and cyclin B1. The oscillation profiles of the system such as period and number of cycles

68 can be reliably regulated by the amount of cyclin B1 mRNAs or sizes of droplets.  
69 Additionally, we found that energy may be a critical factor for cell cycle behaviors.

70

## 71 **RESULTS AND DISCUSSION**

### 72 **The oscillator reliably drives the periodic progression of multiple mitotic events**

73 To create a cell-like *in vitro* mitotic system, we used a simple vortexing technique (Ho et  
74 al., 2017) to compartmentalize reactions of cycling *Xenopus* egg extracts (Murray, 1991)  
75 into oil droplets, with radius ranging from 10  $\mu\text{m}$  to 300  $\mu\text{m}$  (Figure 1B, Materials and  
76 Methods). The droplets were loaded on a Teflon-coated chamber and recorded using  
77 long-term time-lapse fluorescence microscopy. The fluorescence time courses of each  
78 droplet were analyzed to obtain information of period, amplitude, number of cycles, droplet  
79 size, etc.

80 To examine the functionality of the droplet mitotic system, we added de-membranated  
81 sperm chromatin, purified green fluorescent protein-nuclear localization signal (GFP-  
82 NLS), securin-mCherry mRNA and Hoechst 33342 dyes to the cytoplasmic extracts.  
83 Figure 1C demonstrates a typical artificial mitotic cell capable of reconstructing at least  
84 three mitotic processes in parallel that alternate between interphase and mitosis. The  
85 autonomous alternation of distinct cell-cycle phases is driven by a self-sustained oscillator,  
86 the activity of which was indicated by the periodic degradation of an anaphase substrate  
87 of APC/C, securin-mCherry. In interphase, the presence of sperm chromosomal DNA,  
88 labeled by Hoechst, initiated the self-assembly of a nucleus, upon which GFP-NLS protein  
89 was imported through the nuclear pores. The spatial distributions of Hoechst and GFP-  
90 NLS thus coincided for an interphase nucleus. As the artificial cell enters mitosis, the  
91 chromosome condensed resulting a tighter distribution of Hoechst, while the nuclear  
92 envelope broke down and GFP-NLS quickly dispersed into a uniform distribution in the  
93 whole droplet. The time courses for these processes were analyzed in Figure 1D,  
94 indicating that the chromosome condensation and nuclear envelope breakdown (NEB)  
95 happened before securin degradation at each cycle. All together, these experiments  
96 showed that the droplet system successfully reconstituted a cell-free mitotic oscillator of  
97 Cdk1 and APC/C that can reliably drive the periodic progression of downstream events  
98 including chromosome morphology change and nuclear envelope breakdown and re-  
99 assembly, like what occurs *in vivo*.

100

### 101 **The oscillator is effectively tunable in frequency with cyclin B1 mRNAs**

102 The ability to adjust frequency is an important feature for an oscillator (Tsai et al., 2008).  
103 Here, we demonstrated the present system provides an effective experimental solution to

104 the study of tunability of the clock. To avoid any interference from the complicated nuclear  
105 dynamics, we reconstituted a minimal mitotic cycle system which, in the absence of sperm  
106 chromatin, formed no nuclei. This simple, cytoplasmic-only oscillator produced highly  
107 robust, undamped, self-sustained oscillations up to 32 cycles over 4 days (Figure 2A, B  
108 and Supplementary Video 1), significantly better than many existing synthetic oscillators.

109 To modulate the speed of the oscillations, we supplied the system with various  
110 concentrations of purified mRNAs of full-length cyclin B1 fused to YFP (cyclin B1-YFP),  
111 which function both as a reporter of APC/C activity and as an activator of CDK1. A droplet  
112 supplied with both cyclin B1-YFP and securin-mCherry mRNAs exhibited oscillations with  
113 highly correlated signals (Figure 2C), suggesting that both are reliable reporters for the  
114 oscillator activity. With an increased concentration of cyclin B1-YFP mRNAs added to the  
115 system, we observed a decrease in the average period (Figure 2D), meaning that a higher  
116 cyclin B1 concentration tends to speed up the oscillations. However, the average number  
117 of cycles (Figure 2E) was also reduced with increased cyclin B1 concentrations, resulting  
118 in a negative correlation between the lifetime of oscillations and the amount of cyclin B1  
119 mRNAs. The extracts will eventually arrest at a mitotic phase in the presence of high  
120 concentrations of cyclin B1.

121

### 122 **The behavior of the single droplet oscillator is size-dependent**

123 Moreover, this system provides high flexibility in analyzing droplets with radii ranging from  
124 a few  $\mu\text{m}$  to above 200  $\mu\text{m}$ , enabling characterization of size-dependent behaviors of cell  
125 cycles. At the scale of a cell, the dynamics of biochemical reactions may become  
126 stochastic. Although stochastic phenomenon has been studied extensively in genetic  
127 expressions, studying a system that is out of steady-state can be challenging in living  
128 organisms due to low throughput and complications from cell growth, divisions and other  
129 complex cellular environments. These limitations can be overcome by reconstitution of  
130 cell-scale *in vitro* oscillators in absence of cell growth and divisions. Parallel tracking of  
131 droplets also enables data generation for statistical analysis. Figures 2F and 2G showed  
132 that smaller droplets led to slower oscillations with a larger variance of the periods,  
133 consistent with the size effect reported on an *in vitro* transcriptional oscillator (Weitz et al.,  
134 2014). We also observed a reduced number of oscillations and a smaller variance of the  
135 cycle number in smaller droplets.

136

### 137 **Energy depletion model recapitulates dynamics of the oscillator**

138 The results in Figure 2D-G indicated that the system is tunable by cyclin B1 mRNA  
139 concentration and droplet size in different manners. Although the period and number of

140 cycles responded to varying droplet sizes in opposite directions, they followed the same  
141 trend when modulated by cyclin B1 mRNAs, resulting in a lifespan of the oscillatory system  
142 sensitive to cyclin B1 mRNA concentration. Moreover, we have observed that securin-  
143 mCherry and cyclin B1-YFP both exhibited oscillations of increased amplitude, baseline,  
144 and period over time (Figure 2C, Supplementary figure 1A, B), which cannot be explained  
145 by existing cell cycle models (Yang and Ferrell, 2013; Tsai et al., 2014).

146 Unlike intact embryos, cell-free extracts lack yolk as an energy source and lack  
147 sufficient mitochondria for energy regeneration. We postulated that energy is an important  
148 regulator for a droplet system with a limited amount of energy source consumed over time.  
149 To gain insights into our experimental observations and better understand the *in vitro*  
150 oscillator system, we built a model to examine how energy consumption plays a role in the  
151 oscillation behaviors. The energy depletion model is based on a well-established cell-cycle  
152 model (Yang and Ferrell, 2013; Tsai et al., 2014) modified by introducing ATP into all  
153 phosphorylation reactions (Figure 3A, Materials and methods 7 and 8).

154 In the cell cycle network, the activation of Cdk1 is co-regulated by a double positive  
155 feedback through a phosphatase Cdc25 and a double negative feedback through a kinase  
156 Wee1. The balance between Wee1 and Cdc25 activity was suggested to be crucial for the  
157 transition of cell cycle status during early embryo development (Tsai et al., 2014). In light  
158 of this, we defined the balance between Wee1 and Cdc25 by the ratio  $R = \frac{k_{Wee1}[Wee1]}{k_{Cdc25}[Cdc25]}$ .

159 We noted that ATP-dependent phosphorylation of Cdc25 and Wee1 can decrease  $R$  by  
160 activating Cdc25 and inhibiting Wee1 simultaneously, resulting in a high dependence of  
161  $R$  on the ATP concentration (Figure 3B).

162 Using this model, we further investigated the relationship between ATP and the  
163 oscillation behaviors. In Figure 3C, the phase plot of the two-ODE model shows that at a  
164 low  $R$  (e.g. 0.5), the system will stay in a stable steady-state with low cyclin B concentration  
165 and at a high  $R$  (e.g. 2.5), the oscillation will be arrested in a stable steady-state with high  
166 cyclin B concentration. At an intermediate value, increasing  $R$  produced oscillations of  
167 increased amplitude, baseline and period (Figure 3C, D). If we assume that the available  
168 ATP concentration decreases over time, we can readily recapitulate the experimentally  
169 observed increment of amplitude, baseline, and period of the cyclin B time course (Figure  
170 3E).

171 We noted that, besides phosphorylation, other processes, including protein synthesis  
172 and ubiquitination-mediated degradation, also consume ATPs and are sensitive to the  
173 energy level. However, the changes of synthesis and degradation rates yielded no obvious  
174 effects on the amplitude and baseline (Supplementary figure 1D).

175 The energy depletion model also predicted the experimental observations in Figure  
176 2D-G by showing that increasing cyclin B concentrations decreased both period and  
177 number of cycles (Supplementary Figure 1C), while when the droplet diameter increased,  
178 the mean (and standard deviation) period decreased with increased mean (and standard  
179 deviation) number of cycles (Supplementary Figure 1E).

180 We have developed here a novel artificial cell system that enables highly robust and  
181 tunable mitotic oscillations. The system is amenable to high throughput, quantitative  
182 manipulation and analysis of both cytoplasmic and nuclear processes. Given cell cycles  
183 share common topologies with many biological oscillators, the system may be valuable to  
184 investigate fundamental principles of oscillator theory.

185 Our energy depletion model suggested an interesting mechanism to modulate  
186 oscillations with a single control parameter  $R$  that depends on the energy-tunable balance  
187 of two positive feedback loops. Considering that the rapid, non-stopping cell divisions of  
188 an early embryo require a large amount of energy, this energy-dependent control may  
189 function as a “checkpoint” to arrest cell cycles if  $R$  becomes too large.

190

## 191 **MATERIALS AND METHODS**

### 192 **1. Cycling *Xenopus laevis* extract preparation**

193 Cycling *Xenopus* extracts were prepared as described (Murray, 1991), except that eggs  
194 were activated with calcium ionophore A23187 (200 ng/ $\mu$ L) rather than electric shock.  
195 Freshly prepared extracts were kept on ice while applied with de-membrated sperm  
196 chromatin (to approximately 250 per  $\mu$ l of extract), GFP-NLS (10  $\mu$ M) and recombinant  
197 mRNAs of securin-mCherry (10 ng/ $\mu$ L) and cyclin B1-YFP (ranging from 0 to 10 ng/ $\mu$ L).  
198 The extracts were mixed with surfactant oil 2% PFPE-PEG to generate droplets.

199

### 200 **2. Fluorescence-labeled reporters**

201 GFP-NLS protein was expressed in BL21 (DE3)-T-1 competent cells (Sigma Aldrich,  
202 B2935) that were induced by 0.1 mM IPTG (Isopropyl  $\beta$ -D-1-thiogalactopyranoside, Sigma  
203 Aldrich, I6758) overnight. Cells were broken down to release protein through sonication.  
204 GE Healthcare Glutathione Sepharose 4B beads (Sigma Aldrich, GE17-0756-01) and PD-  
205 10 column (Sigma Aldrich, GE17-0851-01) were used to purify and elute GFP-NLS  
206 protein. 200 mg/ml Hoechst 33342 (Sigma Aldrich, B2261) was added to stain  
207 chromosomes. Securin-mCherry and cyclin B1-YFP plasmids were constructed using  
208 Gibson assembly method (Gibson et al., 2009). All mRNAs were *in vitro* transcribed and  
209 purified using mMMESSAGE mMACHINE SP6 Transcription Kit (Ambion, AM1340).

210

### 211 **3. Teflon-coated microchamber preparation**

212 VitroCom miniature hollow glass tubing with height of 100  $\mu\text{m}$  (VitroCom, 5012) into pieces  
213 was cut into pieces with lengths of 3-5 mm. A heating block was heated up to 95°C in a  
214 Fisher Scientific Isotemp digital incubator and then it was placed into a Bel-art F42025-  
215 0000 polycarbonate vacuum desiccator with white polypropylene bottom. The cut glass  
216 tubes and a 1.5 ml Eppendorf tube containing 30  $\mu\text{l}$  Trichloro (1H,1H,2H,2H-  
217 perfluorooctyl) silane (Sigma Aldrich, 448931) were placed in the heating block. Vacuum  
218 was applied to the desiccator and the tubes was left incubated overnight.

219

### 220 **4. Generation of droplet-based artificial cells**

221 To generate droplets, we used a Fisher Scientific vortex mixer to mix 20  $\mu\text{l}$  cycling extract  
222 reaction mix, and 200  $\mu\text{l}$  2% PFPE-PEG surfactant (Ran Biotechnologies, 008-  
223 FluoroSurfactant-2wtH-50G) at speed level 10 for 3 seconds. By adjusting the vibration  
224 speed and ratio between aqueous and oil phase appropriately, we can obtain droplets with  
225 various sizes, ranging from 10  $\mu\text{m}$  to 300  $\mu\text{m}$ .

226

### 227 **5. Time-lapse fluorescence microscopy**

228 All imaging was conducted on an Olympus FV1200 confocal microscope under MATL  
229 mode (multiple area time lapse) and Olympus IX83 microscope equipped with a motorized  
230 x-y stage, at room temperature. Time-lapse images were recorded in brightfield and  
231 multiple fluorescence channels at a time interval of 6-9 minutes for at least 12 hours up to  
232 four days.

233

### 234 **6. Image analysis and data processing**

235 We used Imaris 8.1.2 (Bitplane Inc.) for image processing. Level-set method on brightfield  
236 images was used for droplet segmentation, and autoregressive motion algorithm was used  
237 for tracking. Tracks that had less than two oscillations were discarded. Results were then  
238 manually curated for accuracy. Means and standard deviations of fluorescence intensities  
239 as well as areas of each droplet were calculated for further analysis. The volume of a  
240 droplet was calculated using the formula proposed by a previous study (Good et al., 2013).  
241 To compensate for intensity drift over time, fluorescence intensity in droplets were  
242 normalized by average intensity of the background. For period calculation, Matlab  
243 (Mathworks Inc.) was used to detect peaks and troughs over the smoothed signal of mean  
244 intensity for cyclin B-YFP and securin-mCherry. All peaks were manually curated and  
245 edited to ensure reliability.

246

## 247 7. A two-ODE model of the embryonic cell cycle and stochastic simulations

248 Complicated models have been proposed to describe the embryonic cell cycle oscillation  
 249 (Novak and Tyson, 1993a; Ciliberto et al., 2003; Pomerening et al., 2005; Tsai et al., 2008).  
 250 However, simple two-ODE models with fewer parameters are more amenable to analysis,  
 251 while still capturing the general property of the feedback loops. We described the net  
 252 productions of cyclin B1 and active cyclinB-Cdk1 complex  $[Cdk1_a]$  using the following two  
 253 equations (Yang and Ferrell, 2013; Tsai et al., 2014):

$$\begin{aligned}
 254 \quad \frac{d}{dt}[CyclinB] &= k_{sy} - k_{deg}[CyclinB] \\
 255 \quad &= k_{sy} - \left( a_{deg} + \frac{b_{deg}[Cdk1_a]^{n_{deg}}}{[Cdk1_a]^{n_{deg}} + EC50_{deg}^{n_{deg}}} \right) [CyclinB] \quad Eq. 1
 \end{aligned}$$

$$\begin{aligned}
 256 \quad \frac{d}{dt}[Cdk1_a] &= k_{sy} + k_{cdc25}[Cdc25 - Pi]([CyclinB] - [Cdk1_a]) - k_{wee1}[Wee1][Cdk1_a] \\
 257 \quad &- k_{deg}[Cdk1_a] \\
 258 \quad &= k_{sy} \\
 259 \quad &+ \frac{1}{\sqrt{r}} \left( a_{cdc25} + \frac{b_{cdc25}[Cdk1_a]^{n_{cdc25}}}{[Cdk1_a]^{n_{cdc25}} + EC50_{cdc25}^{n_{cdc25}}} \right) ([CyclinB] - [Cdk1_a]) \\
 260 \quad &- \sqrt{r} \left( a_{wee1} + \frac{b_{wee1}EC50_{wee1}^{n_{wee1}}}{[Cdk1_a]^{n_{wee1}} + EC50_{wee1}^{n_{wee1}}} \right) [Cdk1_a] \\
 261 \quad &- \left( a_{deg} + \frac{b_{deg}[Cdk1_a]^{n_{deg}}}{[Cdk1_a]^{n_{deg}} + EC50_{deg}^{n_{deg}}} \right) [Cdk1_a] \quad Eq. 2
 \end{aligned}$$

262 The parameters for the model are listed below:

|                |             |
|----------------|-------------|
| $k_{sy}$       | 1 nM/min    |
| $a_{wee1}$     | 0.08 nM/min |
| $b_{wee1}$     | 0.4 nM/min  |
| $n_{wee1}$     | 3.5         |
| $EC50_{wee1}$  | 35 nM       |
| $a_{cdc25}$    | 0.16 nM/min |
| $b_{cdc25}$    | 0.8 nM/min  |
| $n_{cdc25}$    | 11          |
| $EC50_{cdc25}$ | 30 nM       |
| $a_{deg}$      | 0.01 nM/min |
| $b_{deg}$      | 0.04 nM/min |
| $n_{deg}$      | 17          |
| $EC50_{deg}$   | 32 nM       |



263 Here,  $[CyclinB]$  and  $[Cdk1_a]$  refer to the concentrations of cyclin B1 and active cyclin  
 264 B1-Cdk1 complex.  $[Wee1]$  is the concentration of active Wee1, while  $[Cdc25 - Pi]$  is the  
 265 concentration of active Cdc25. We assumed that Cyclin B1 is synthesized at a constant  
 266 rate. Its degradation rate is dependent on Cdk1 activity in the form of Hill function with  
 267 exponent of 17 (Yang and Ferrell, 2013). Active cyclin B1-Cdk1 complex can also be  
 268 eliminated through cyclin degradation. In addition, we considered that the concentration  
 269 of Cdk1 to be high compared to the peak concentration of cyclin B1 (Hochegger et al.,  
 270 2001; Kobayashi et al., 1991) and the affinity of these cyclins for Cdk1 to be high  
 271 (Kobayashi et al., 1994). Thus, there is no unbound form of cyclin B1, and the newly  
 272 synthesized cyclin B1 is converted to cyclin-Cdk1 complexes, which are rapidly  
 273 phosphorylated by the Cdk-activating kinase CAK to produce active Cdk1. According to  
 274 previous studies, these complexes can then be inactivated by Wee1 and re-activated by  
 275 Cdc25, via the double-negative and positive feedback loops, with Hill exponent of  $n_{Wee1}$   
 276 as 3.5 and  $n_{Cdc25}$  as 11 (Kim and Ferrell, 2007; Trunnell et al., 2011).

277 We use a free parameter  $r$ , representing the ratio of the double negative and double  
 278 positive feedback strengths, to permute the balance between the two feedbacks. This  
 279 balance is suggested to be critical for oscillatory properties (Tsai et al., 2014). Note that  
 280 this  $r$  is a parameter while  $R$  in the main text is a measurement that changes over a  
 281 simulation.

282 In droplets that have small volumes and contain small numbers of molecules, the  
 283 stochastic nature of the underlying biochemical reactions must be considered. We  
 284 adapted a stochastic two-ODE model (Yang and Ferrell, 2013), and converted our two-  
 285 ODE model to the corresponding chemical master equations (Kampen, 1992) and carried  
 286 out numerical simulations using the Gillespie algorithm (Gillespie, 1977). The reaction  
 287 rates and molecular stoichiometry are shown in Table 1.

288

289 **Table 1: Reaction rates and stoichiometry of the two-ODE model**

| Reaction                     | Rate                                                                                                                                                                    | Stoichiometry                                                                                                  |
|------------------------------|-------------------------------------------------------------------------------------------------------------------------------------------------------------------------|----------------------------------------------------------------------------------------------------------------|
| Active Cdk1 Synthesis        | $\rho_1 = k_{sy}$                                                                                                                                                       | $\langle Cdk1_a \rangle = \langle Cdk1_a \rangle + 1$                                                          |
| Active Cdk1 to Inactive Cdk1 | $\rho_2 = \sqrt{r} \left( a_{Wee1} + \frac{b_{Wee1} EC50_{Wee1}^{n_{Wee1}}}{\langle Cdk1_a \rangle^{n_{Wee1} + EC50_{Wee1}^{n_{Wee1}}}} \right) \langle Cdk1_a \rangle$ | $\langle Cdk1_a \rangle = \langle Cdk1_a \rangle - 1$<br>$\langle Cdk1_i \rangle = \langle Cdk1_i \rangle + 1$ |

|                              |                                                                                                                                                                                                    |                                                                                                                |
|------------------------------|----------------------------------------------------------------------------------------------------------------------------------------------------------------------------------------------------|----------------------------------------------------------------------------------------------------------------|
| Inactive Cdk1 to Active Cdk1 | $\rho_3 = \frac{1}{\sqrt{r}} \left( a_{Cdc25} + \frac{b_{Cdc25} \langle Cdk1_a \rangle^{n_{Cdc25}}}{\langle Cdk1_a \rangle^{n_{Cdc25}} + EC50_{Cdc25}^{n_{Cdc25}}} \right) \langle Cdk1_i \rangle$ | $\langle Cdk1_a \rangle = \langle Cdk1_a \rangle + 1$<br>$\langle Cdk1_i \rangle = \langle Cdk1_i \rangle - 1$ |
| Active Cdk1 Degradation      | $\rho_4 = \left( a_{deg} + \frac{b_{deg} \langle Cdk1_a \rangle^{n_{deg}}}{\langle Cdk1_a \rangle^{n_{deg}} + EC50_{deg}^{n_{deg}}} \right) \langle Cdk1_a \rangle$                                | $\langle Cdk1_a \rangle = \langle Cdk1_a \rangle - 1$                                                          |
| Inactive Cdk1 Degradation    | $\rho_5 = \left( a_{deg} + \frac{b_{deg} \langle Cdk1_a \rangle^{n_{deg}}}{\langle Cdk1_a \rangle^{n_{deg}} + EC50_{deg}^{n_{deg}}} \right) \langle Cdk1_i \rangle$                                | $\langle Cdk1_i \rangle = \langle Cdk1_i \rangle - 1$                                                          |

290

## 291 8. A stochastic model of the embryonic cell cycle including energy effect

292 To explore how energy consumption could affect the oscillations, we took ATP into  
293 account for phosphorylation and dephosphorylation of Wee1 (Tuck et al., 2013), such that:

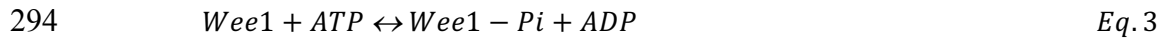

295 In our model, we assumed Wee1 is in equilibrium with the activity of Cdk1 due to fast  
296 reactions between Cdk1 and Wee1. Using the reaction coefficients for Wee1  
297 phosphorylation as  $k_{1Wee1}$  and that for Wee1-Pi dephosphorylation as  $k_{2Wee1}$ , along with  
298 the steady-state approximation, we have:

$$299 \quad k_{1Wee1}[Wee1][ATP] = k_{2Wee1}[Wee1 - Pi][ADP]$$

$$300 \quad = k_{2Wee1}([Wee1_{tot}] - [Wee1])(1 - [ATP]) \quad Eq. 4$$

301 All above modifications for Wee1 reactions also applied to Cdc25. After normalizing [ATP]  
302 and [ADP] by  $[ATP] + [ADP]$ , we have the updated reaction rates summarized in Table 2.  
303 Here the  $[wee1]_0$  and  $[cdc25-Pi]_0$  represent the steady-state concentration of active Wee1  
304 and Cdc25 when ATP is not considered in reaction. The ratios of the steady-state to total  
305 concentrations of Wee1 and Cdc25 can be calculated as a function of active CDK1 using  
306 the parameters from previous work (Novak and Tyson, 1993b).

307

308 **Table 2: Reaction rates in the model considering ATP**

| Reaction                     | Rate                                                                                                                                                                                                                                                                                           |
|------------------------------|------------------------------------------------------------------------------------------------------------------------------------------------------------------------------------------------------------------------------------------------------------------------------------------------|
| Active Cdk1 Synthesis        | $\rho_1 = k_{sy}$                                                                                                                                                                                                                                                                              |
| Active Cdk1 to Inactive Cdk1 | $\rho_2 = 2[ATP] \langle Cdk1_a \rangle \left( a_{Wee1} + \frac{b_{Wee1} EC50_{Wee1}^{n_{Wee1}}}{\langle Cdk1_a \rangle^{n_{Wee1}} + EC50_{Wee1}^{n_{Wee1}}} \right) \left( \frac{1 - [ATP]}{[ATP] \left( 1 - \frac{2[Wee1_0]}{[Wee1_{tot}]} \right) + \frac{[Wee1_0]}{[Wee1_{tot}]}} \right)$ |

|                              |                                                                                                                                                                                                                                                                                                     |
|------------------------------|-----------------------------------------------------------------------------------------------------------------------------------------------------------------------------------------------------------------------------------------------------------------------------------------------------|
| Inactive Cdk1 to Active Cdk1 | $\rho_3 = \langle Cdk1_i \rangle \left( a_{Cdc25} + \frac{b_{Cdc25} \langle Cdk1_a \rangle^{n_{Cdc25}}}{\langle Cdk1_a \rangle^{n_{Cdc25}} + EC50_{Cdc25}^{n_{Cdc25}}} \right) \left( \frac{[ATP]}{1 - \frac{[Cdc25-P10]}{[Cdc25_{tot}]} + (2 \frac{[Cdc25-P10]}{[Cdc25_{tot}]} - 1)[ATP]} \right)$ |
| Active Cdk1 Degradation      | $\rho_4 = \left( a_{deg} + \frac{b_{deg} \langle Cdk1_a \rangle^{n_{deg}}}{\langle Cdk1_a \rangle^{n_{deg}} + EC50_{deg}^{n_{deg}}} \right) \langle Cdk1_a \rangle$                                                                                                                                 |
| Inactive Cdk1 Degradation    | $\rho_5 = \left( a_{deg} + \frac{b_{deg} \langle Cdk1_a \rangle^{n_{deg}}}{\langle Cdk1_a \rangle^{n_{deg}} + EC50_{deg}^{n_{deg}}} \right) \langle Cdk1_i \rangle$                                                                                                                                 |

309

### 310 Acknowledgements

311 We thank Madeleine Lu for constructing securin-mCherry plasmid, Lap Man Lee and  
 312 Kenneth Ho for discussions about droplet generation, Neha Bidthanapally and Zheng  
 313 Yang for helping image processing, Jeremy B. Chang and James E. Ferrell Jr for providing  
 314 GFP-NLS construct. This work was supported by the National Science Foundation (Early  
 315 CAREER Grant #1553031), the National Institutes of Health (MIRA #GM119688), and a  
 316 Sloan Research Fellowship.

317

318 **FIGURE AND FIGURE LEGENDS**

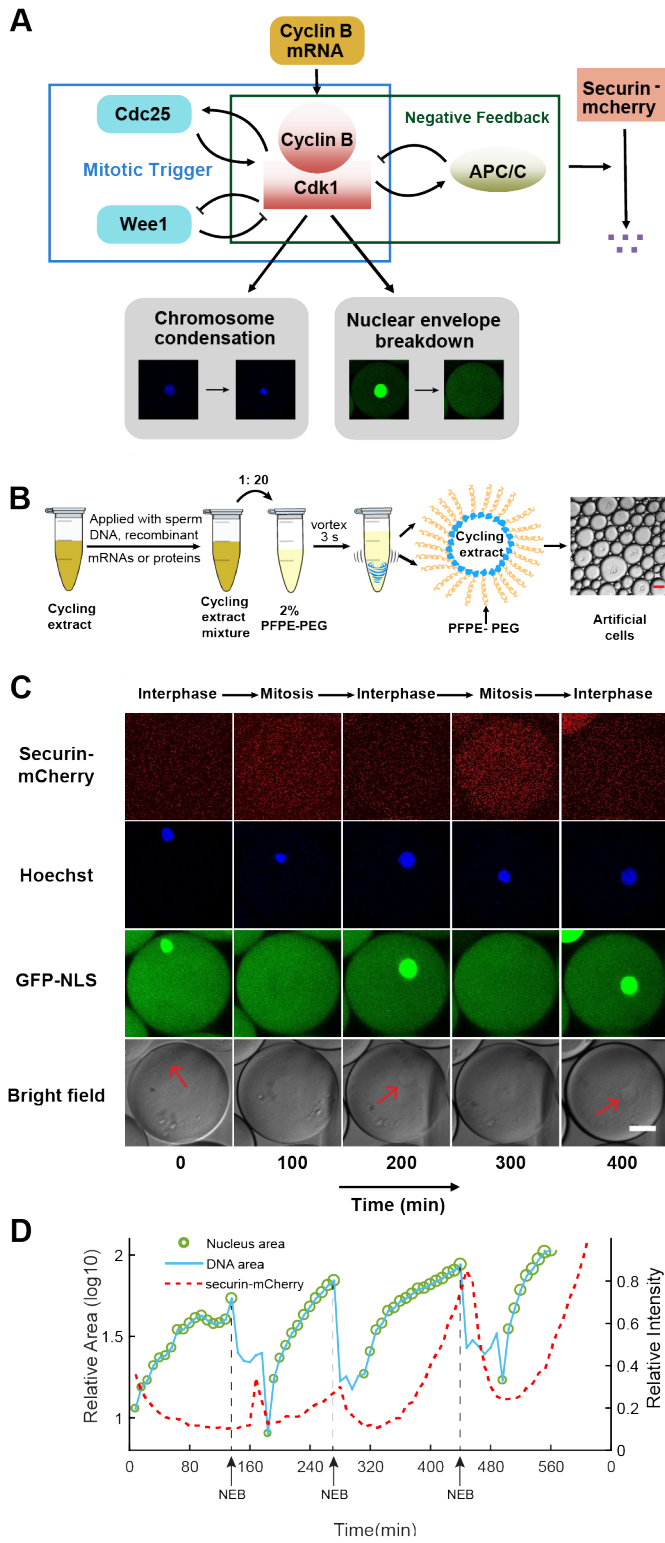

319

320

321 **Figure 1. Reconstitution of an *in vitro* cell cycle clock and downstream mitotic**  
322 **events.**

323 A. Schematic view of a cell cycle oscillator that consists of coupled positive and negative  
324 feedback loops. The central regulator, cyclin B-Cdk1 complex activates its own activator,  
325 phosphatase Cdc25, forming a positive feedback loop, and inhibits its own inhibitor, kinase  
326 Wee1, forming a double negative feedback loop. Additionally, cyclinB-Cdk1 activates the  
327 E3 ubiquitin ligase APC/C, which targets cyclin B for degradation and completes a core  
328 negative feedback loop. Active APC/C also promotes the degradation of another substrate  
329 securin. Once cyclinB1-Cdk1 complex is activated, the circuit drives a set of mitotic events  
330 including chromosome condensation and nuclear envelope breakdown (NEB).

331  
332 B. Experimental procedures. Cycling *Xenopus* extracts are supplemented with various  
333 combinations of recombinant proteins, mRNAs, and de-membrated sperm DNAs, which  
334 are encapsulated in 2% Perfluoropolyether-poly (ethylene glycol) (PFPE-PEG) oil  
335 microemulsions. Scale bar is 100  $\mu\text{m}$ .

336  
337 C. Snapshots of a droplet were taken periodically both in fluorescence channels (top three  
338 rows) and bright-field (the last row). The cyclic progression of the cell cycle clock and its  
339 downstream mitotic processes is simultaneously tracked by multiple fluorescence  
340 reporters. The clock regulator APC/C activity is reported by its substrate securin-mCherry,  
341 chromosomal morphology changes by the Hoechst stains, and NEB by GFP-NLS. Nuclear  
342 envelopes (red arrows) are also detectable on bright field images, matching the  
343 localization of GFP-NLS indicated nuclei. Scale bar is 30  $\mu\text{m}$ .

344  
345 D. Multi-channel measurements for the droplet in Figure 1C. The nucleus area (green  
346 circle) is calculated from the area of the nuclear envelope indicated by GFP-NLS, noting  
347 that the areas of the green circles are also scaled with the real areas calculated for the  
348 nuclei. DNA area curve (blue line) shows the chromosome area identified by Hoechst  
349 33342 dye. Chromosome condensation happens almost at the same time as the nuclear  
350 envelope breaks down (black dashed line). The red dashed line represents the intensity  
351 of securin-mCherry over time, suggesting that degradation of the APC/C substrate lags  
352 behind NEB consistently at each cycle.

353

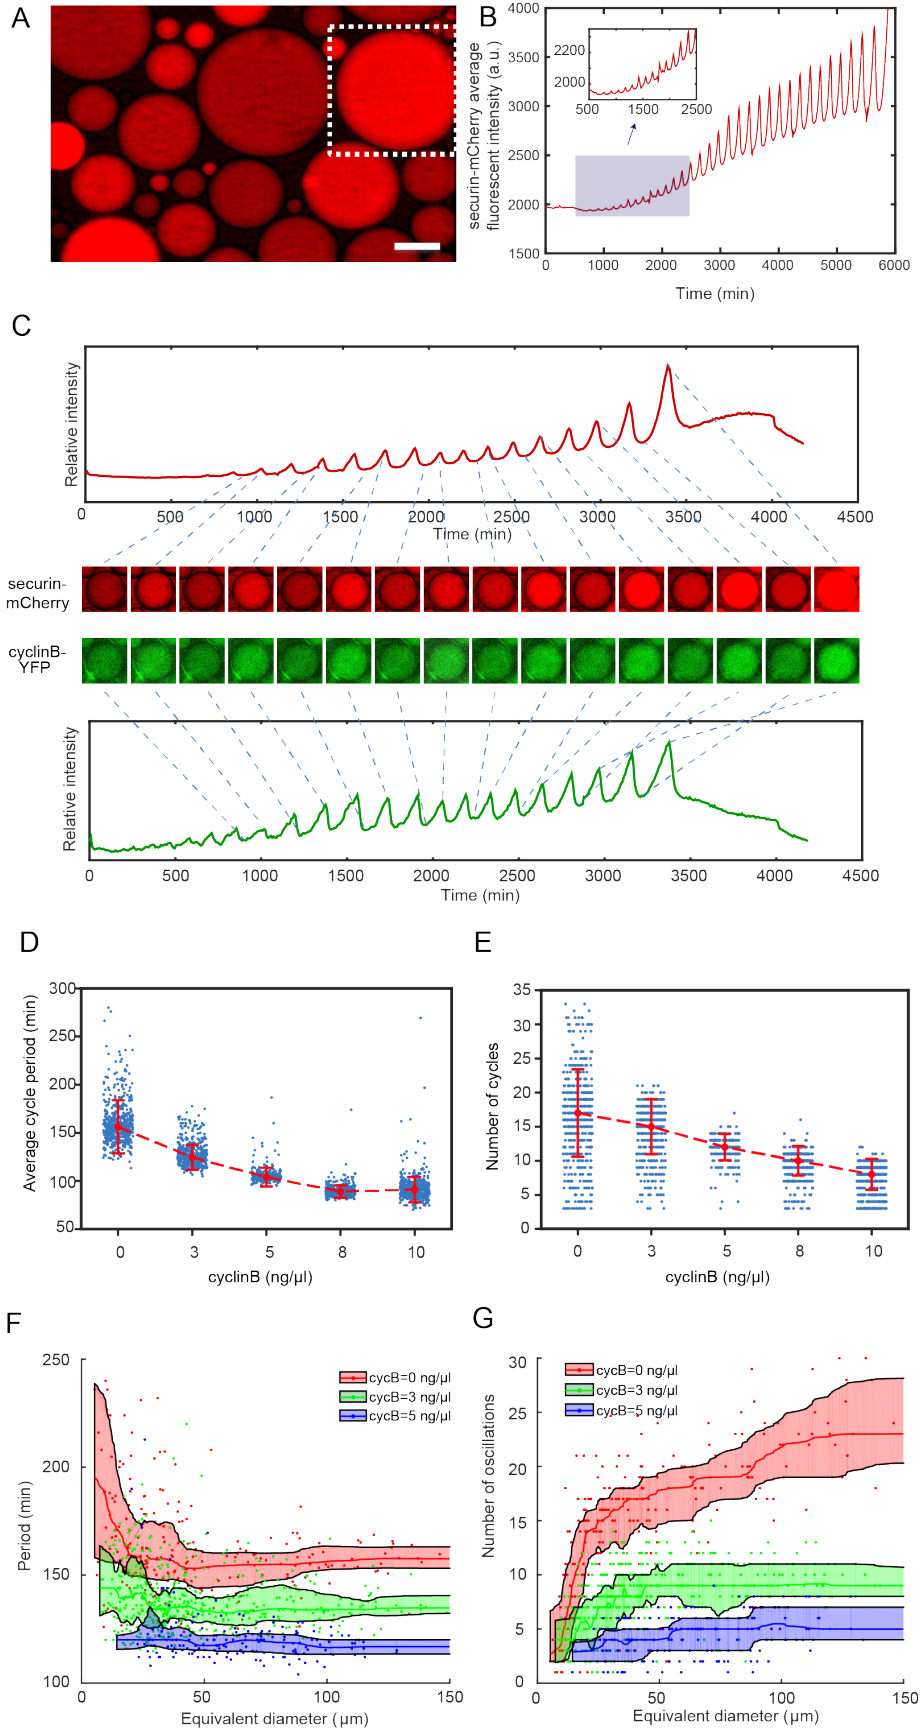

355 **Figure 2. The minimal cell cycle oscillator is robust and tunable.**

356 A. Fluorescence image of securin-mCherry, a reporter for the cell cycle oscillator, in micro-  
357 emulsion droplets (scale bar, 100  $\mu\text{m}$ ). One example droplet (inside the white dotted  
358 framed square) is selected for time course analysis in Figure 2B.

359

360 B. The time course of securin-mCherry fluorescence intensity of the selected droplet from  
361 Figure 2A, indicating 32 undamped oscillations over a course of 100 hours.

362

363 C. Simultaneous measurements of fluorescence intensities of securin-mCherry (upper)  
364 and cyclinB-YFP (lower) within a single droplet, showing sustained oscillations for about  
365 58 hours. The series of mCherry and YFP images correspond to selected peaks and  
366 troughs in the time courses of fluorescence intensities. The two channels have coincident  
367 peaks and troughs for all cycles, suggesting that they both are reliable reporters for the  
368 cell cycle oscillator.

369

370 D, E. The oscillator is tunable in frequency (D) and number of cycles (E) as a function of  
371 the concentration of cyclin B mRNAs. Cyclin B not only functions as a substrate of APC/C  
372 but also binds to Cdk1 for its activation, functioning as an 'input' of the clock. In Figure 2D,  
373 the cell cycle periods are shortened by increasing the mRNA concentrations. In Figure 2E,  
374 the number of total cell cycles is reduced in response to increasing cyclin B mRNA  
375 concentrations. Red dashed line connects medians at different conditions. Error bar  
376 indicates median absolute deviation (MAD).

377

378 F, G. Droplets with smaller diameters have larger periods on average and a wider  
379 distribution of periods (F), and exhibit smaller number of oscillations on average (G).  
380 Colored areas represent moving 25 percentiles to 75 percentiles with a binning size 20.  
381 The equivalent diameter is defined as the cubic root of the volume of a droplet, estimated  
382 by a volume formula in literature (Good et al., 2013). Note that these size effects are less  
383 with higher cyclin B mRNA concentrations.

384

385

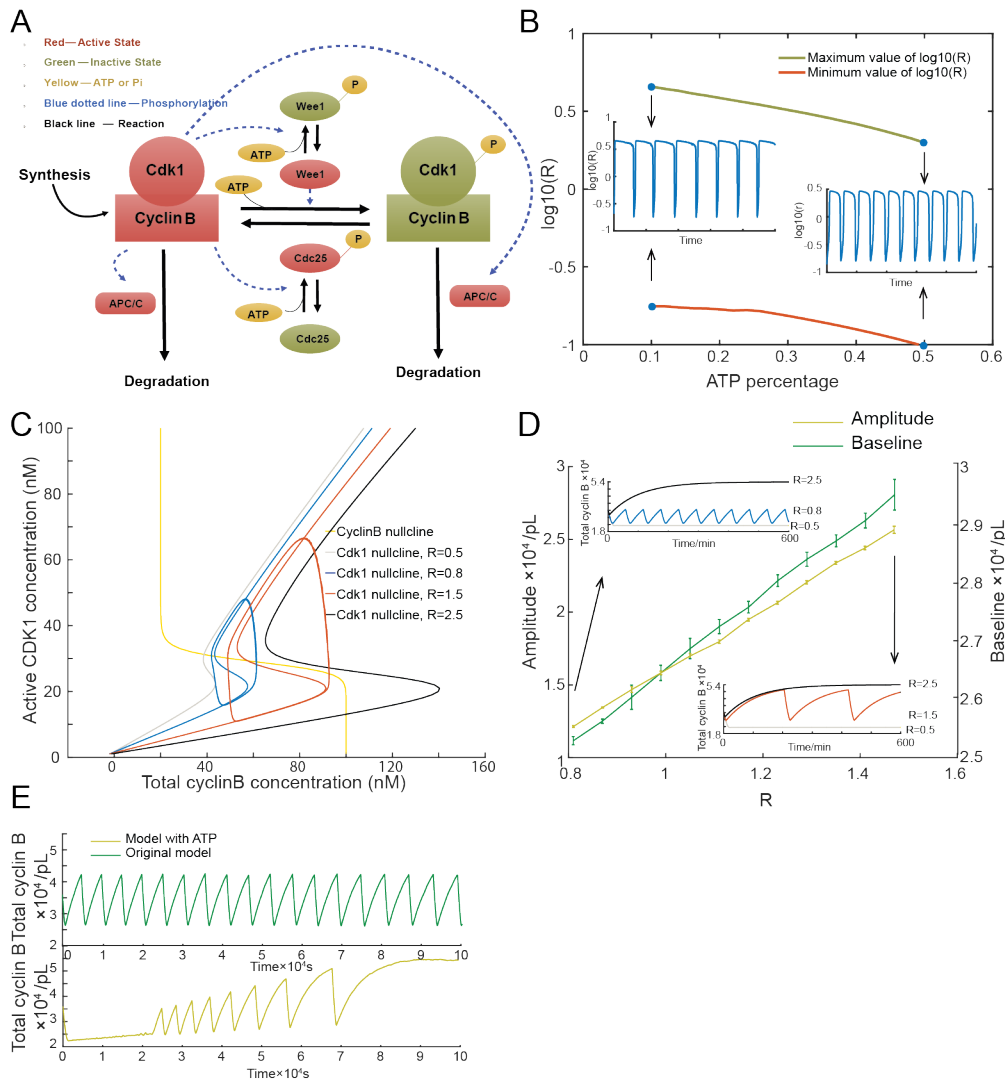

386

387

388 **Figure 3. Stochastic model of cell cycle oscillations.**

389 A. Schematic view of the cyclin B-Cdk1 oscillation system. Note that ATP is taken into  
 390 consideration. Activated molecules are marked in red, inactivated molecules in green and  
 391 ATP or Pi in yellow. Black line indicates a reaction and blue dotted line a phosphorylation.

392

393 B. Relationship between ATP percentage and  $R$  value (ratio of Wee1 activity to Cdc25  
 394 activity), showing that decreasing of ATP concentration leads to a higher  $R$  value. Two  
 395 inserts represent the dynamics of  $R$  value over time when the ATP percentage  
 396  $[ATP]/([ATP]+[ADP])$  is set as 0.1 (left) and 0.5 (right).

397

398 C. Phase plots of the two-ODE model. Parameters for the cyclin B nullcline (yellow) (Yang  
 399 and Ferrell, 2013), and the Cdk1 nullclines with a variety of values of  $R$ , were chosen



400 based on previous experimental work (Pomerening et al., 2003; Sha et al., 2003). Two  
401 sample traces of limit cycle oscillations are plotted for  $R=0.8$  (blue) and  $R=1.5$  (red),  
402 showing that a larger  $R$  value leads to a higher amplitude and baseline. In addition,  $R=0.5$   
403 (gray) generates a low stable steady-state of cyclin B, while  $R=2.5$  (black) a high stable  
404 steady-state of cyclin B. These stable steady-states are indicated by the intersections of  
405 the nullclines.

406

407 D. Relationship between the oscillation baseline and amplitude values and ATP  
408 concentration (positively correlated with  $R$ ). Error bars indicate the ranges of 3 replicates.  
409 Inserts show two example time courses of total cyclin B with different  $R$  values, colors of  
410 which match the ones in Figure 3C.

411

412 E. Time series of total cyclin B molecules from the model without ATP (top panel, green  
413 line) and with ATP (bottom panel, yellow line).

414

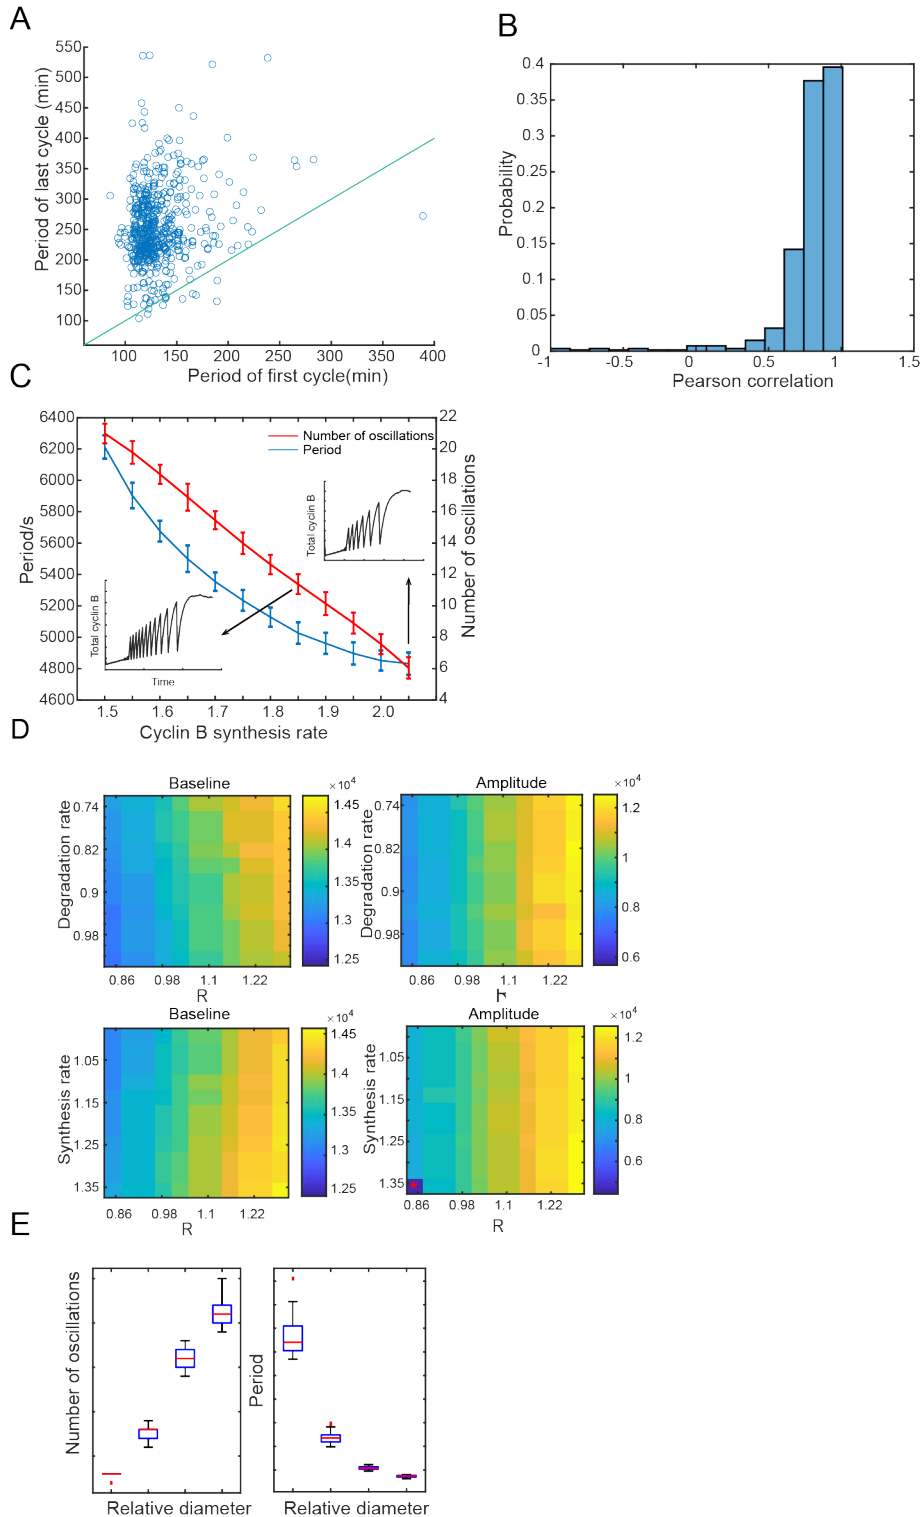

415

416

417 **Supplementary figure 1**

418 A. The period of the first cycle vs the last cycle in a droplet, showing that the period of the

419 last cycle tends to be longer. Blue line indicates the same first and last periods.

420

421 B. Pearson correlation between the period of cycle and the index of cycle in a droplet.  
422 Positive correlation indicates that the cell cycle period tends to increase over time.

423

424 C. The period and number of oscillations decrease with an increasing cyclin B synthesis  
425 rate. Two inserts show example time series of total cyclin B.

426

427 D. Effects of synthesis and degradation rates of cyclin B as well as R on the baseline and  
428 amplitude of oscillations of total cyclin B. Color bar indicates baseline or amplitude of cyclin  
429 B (number of molecules per  $\mu\text{L}$ ). Asterisk means no oscillation to be observed under a  
430 certain condition.

431

432 E. Effects of reaction volume on number of oscillations and period, showing that the  
433 average and variation of numbers of oscillations increase with droplet diameter and the  
434 average and variation of oscillation periods decrease with droplet diameter.

435

436 **Supplementary video 1 (Figure 1C): Reconstitution of cell cycle clock and mitotic**  
437 **events.**

438 This movie corresponds to Figure 1C. Green fluorescence channel shows alternations of  
439 nuclear envelope breakdown and reformation indicated by GFP-NLS protein. Green  
440 circles disappear when nuclear envelope breakdown and reappear when nuclei assemble  
441 again. Blue channel (Hoechst) shows chromosome morphology changes over time.  
442 Securin-mCherry protein oscillations are shown in the red channel. The last channel is  
443 bright field, from which we can see nuclear envelope. Scale bar is 50  $\mu\text{m}$ . The time stamp  
444 gives the real time in hour:minute format. The movie is shown at a rate of 10 frames per  
445 sec.

446

447 **Supplementary video 2 (Figure 2A, B): Free-running *in vitro* cell cycles detected by**  
448 **securin-mCherry reporter.**

449 This video is from the experiment shown in Figure 2A and B. No nuclei are reconstituted  
450 in this experiment. Securin-mCherry proteins perform multiple oscillations and extract  
451 activity lasts for days. The scale bar is 100  $\mu\text{m}$  and the movie is shown at a rate of 25  
452 frames per sec.

453

454 **Supplementary video 3 (Figure 2C): Tuning of the clock speed.**



491 Kim SY & Ferrell JE, Jr. 2007. Substrate competition as a source of ultrasensitivity in the  
492 inactivation of Wee1. *Cell*, 128, 1133-45. doi: 10.1016/j.cell.2007.01.039.

493 Kobayashi H, Golsteyn R, Poon R, Stewart E, Gannon J, Minshull J, Smith R & Hunt T  
494 1991. Cyclins and their partners during *Xenopus* oocyte maturation. *Cold Spring Harb*  
495 *Symp Quant Biol*, 56, 437-47.

496 Kobayashi H, Stewart E, Poon RY & Hunt T 1994. Cyclin A and cyclin B dissociate from  
497 p34cdc2 with half-times of 4 and 15 h, respectively, regardless of the phase of the cell  
498 cycle. *J Biol Chem*, 269, 29153-60.

499 Kumagai A & Dunphy WG 1992. Regulation of the cdc25 protein during the cell cycle in  
500 *Xenopus* extracts. *Cell*, 70, 139-51. doi: 0092-8674(92)90540-S [pii].

501 Lee K, Loros JJ & Dunlap JC 2000. Interconnected feedback loops in the *Neurospora*  
502 circadian system. *Science*, 289, 107-10.

503 Lohka MJ, Hayes MK & Maller JL 1988. Purification of maturation-promoting factor, an  
504 intracellular regulator of early mitotic events. *Proc Natl Acad Sci U S A*, 85, 3009-13.

505 Lohka MJ & Maller JL 1985. Induction of nuclear envelope breakdown, chromosome  
506 condensation, and spindle formation in cell-free extracts. *J Cell Biol*, 101, 518-23.

507 Mueller PR, Coleman TR & Dunphy WG 1995. Cell cycle regulation of a *Xenopus* Wee1-  
508 like kinase. *Mol Biol Cell*, 6, 119-34.

509 Murray AW 1991. Cell cycle extracts. *Methods Cell Biol*, 36, 581-605.

510 Murray AW, Solomon MJ & Kirschner MW 1989. The role of cyclin synthesis and  
511 degradation in the control of maturation promoting factor activity. *Nature*, 339, 280-6. doi:  
512 10.1038/339280a0.

513 Novak B & Tyson JJ 1993a. Modeling the Cell-Division Cycle - M-Phase Trigger,  
514 Oscillations, and Size Control. *Journal of Theoretical Biology*, 165, 101-134. doi: DOI  
515 10.1006/jtbi.1993.1179.

516 Novak B & Tyson JJ 1993b. Numerical analysis of a comprehensive model of M-phase  
517 control in *Xenopus* oocyte extracts and intact embryos. *J Cell Sci*, 106 ( Pt 4), 1153-68.

518 Pomerening JR, Kim SY & Ferrell JE, Jr. 2005. Systems-level dissection of the cell-cycle  
519 oscillator: bypassing positive feedback produces damped oscillations. *Cell*, 122, 565-78.  
520 doi: 10.1016/j.cell.2005.06.016.

521 Pomerening JR, Sontag ED & Ferrell JE, Jr. 2003. Building a cell cycle oscillator:  
522 hysteresis and bistability in the activation of Cdc2. *Nat Cell Biol*, 5, 346-51. doi:  
523 10.1038/ncb954.

524 Rust MJ, Markson JS, Lane WS, Fisher DS & O'shea EK 2007. Ordered phosphorylation  
525 governs oscillation of a three-protein circadian clock. *Science*, 318, 809-12. doi:  
526 10.1126/science.1148596.

527 Sha W, Moore J, Chen K, Lassaletta AD, Yi C-S, Tyson JJ & Sible JC 2003. Hysteresis  
528 drives cell-cycle transitions in *Xenopus laevis* egg extracts. *Proceedings of the National*  
529 *Academy of Sciences*, 100, 975-980. doi: 10.1073/pnas.0235349100.

530 Sudakin V, Ganoth D, Dahan A, Heller H, Hershko J, Luca FC, Ruderman JV & Hershko  
531 A 1995. The cyclosome, a large complex containing cyclin-selective ubiquitin ligase  
532 activity, targets cyclins for destruction at the end of mitosis. *Mol Biol Cell*, 6, 185-97.

533 Thron CD 1996. A model for a bistable biochemical trigger of mitosis. *Biophys Chem*, 57,  
534 239-51.

535 Trunnell NB, Poon AC, Kim SY & Ferrell JE, Jr. 2011. Ultrasensitivity in the Regulation of  
536 Cdc25C by Cdk1. *Mol Cell*, 41, 263-74. doi: 10.1016/j.molcel.2011.01.012.

537 Tsai TY, Choi YS, Ma W, Pomerening JR, Tang C & Ferrell JE, Jr. 2008. Robust, tunable  
538 biological oscillations from interlinked positive and negative feedback loops. *Science*, 321,  
539 126-9. doi: 10.1126/science.1156951.

540 Tsai TY, Theriot JA & Ferrell JE, Jr. 2014. Changes in oscillatory dynamics in the cell cycle  
541 of early *Xenopus laevis* embryos. *PLoS Biol*, 12, e1001788. doi:  
542 10.1371/journal.pbio.1001788.

543 Tuck C, Zhang T, Potapova T, Malumbres M & Novak B 2013. Robust mitotic entry is  
544 ensured by a latching switch. *Biol Open*, 2, 924-31. doi: 10.1242/bio.20135199.

545 Weitz M, Kim J, Kapsner K, Winfree E, Franco E & Simmel FC 2014. Diversity in the  
546 dynamical behaviour of a compartmentalized programmable biochemical oscillator. *Nat*  
547 *Chem*, 6, 295-302. doi: 10.1038/nchem.1869.

548 Yang Q & Ferrell JE, Jr. 2013. The Cdk1-APC/C cell cycle oscillator circuit functions as a  
549 time-delayed, ultrasensitive switch. *Nat Cell Biol*, 15, 519-25. doi: 10.1038/ncb2737.

550
